# Supplementary figures and images for: Examining the degradation of environmentally-daunting per- and poly-fluoroalkyl substances from a fundamental chemical perspective
Source: Royal Society of Chemistry journal article supplement (doi:10.1039/d0cp02445g), 2020-01-01

## M06-2X/6-311+G(2d,2p)

### PFBS

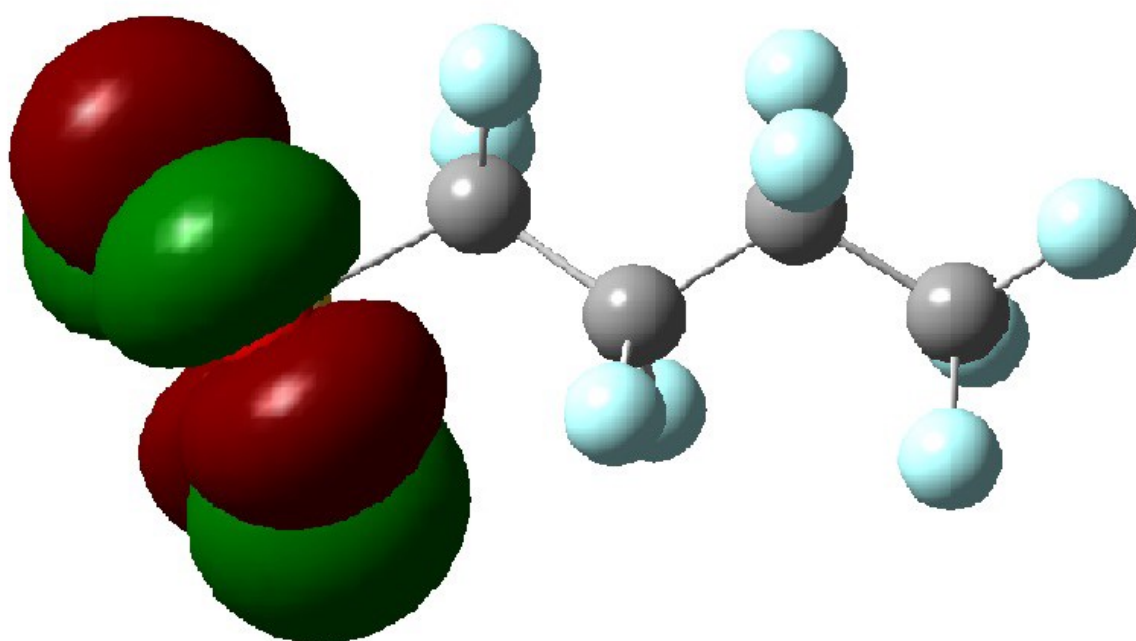

### PFOS

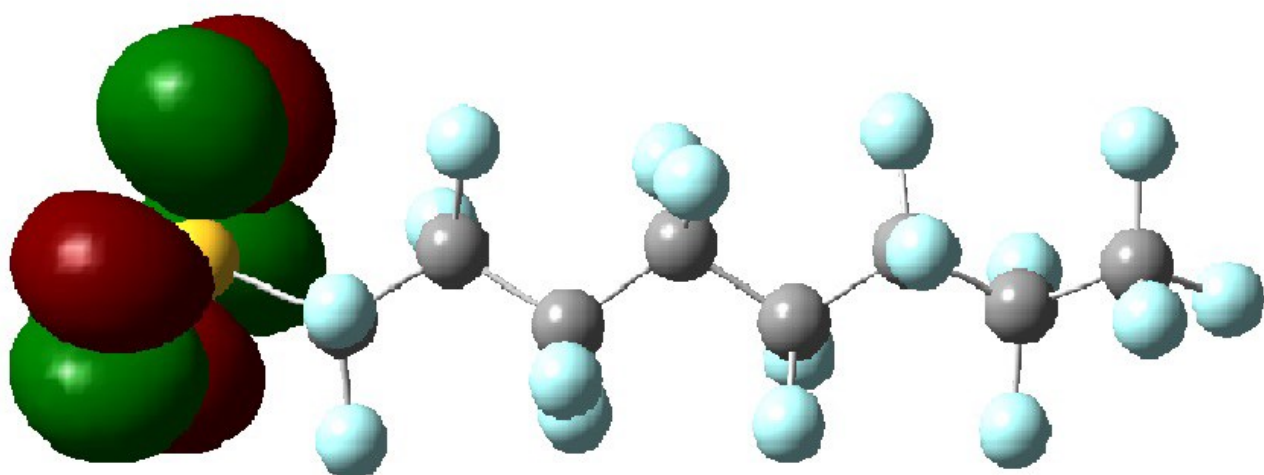

### PFOA

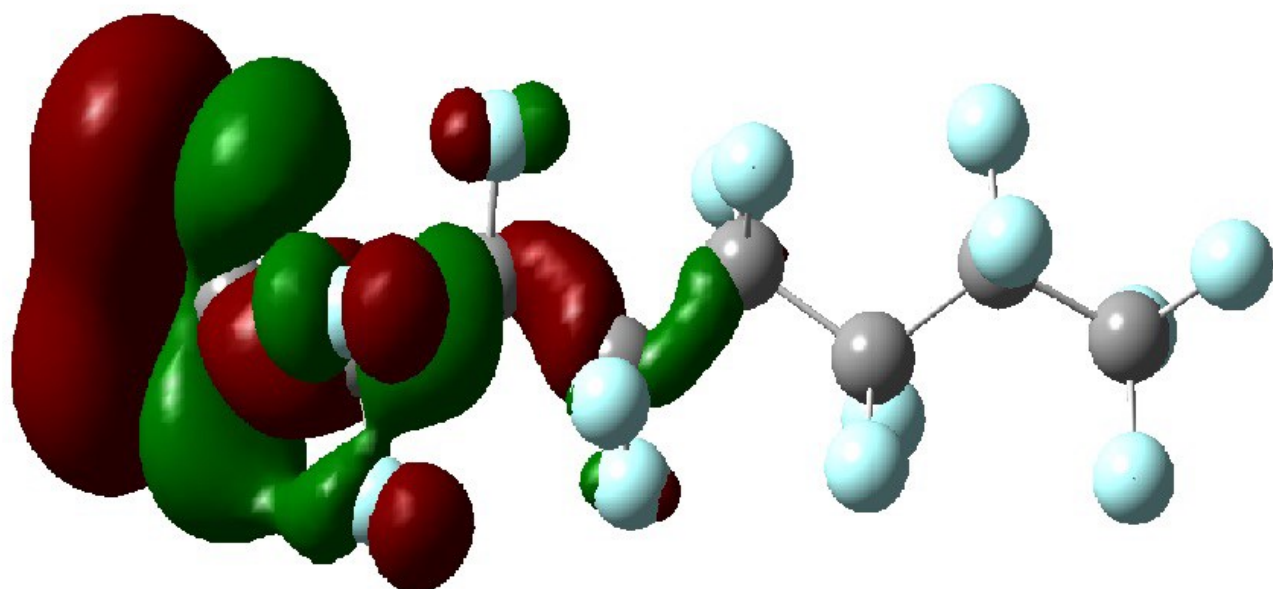

Supplement: d0cp02445g2.pdf [file d0cp02445g2.pdf]

1

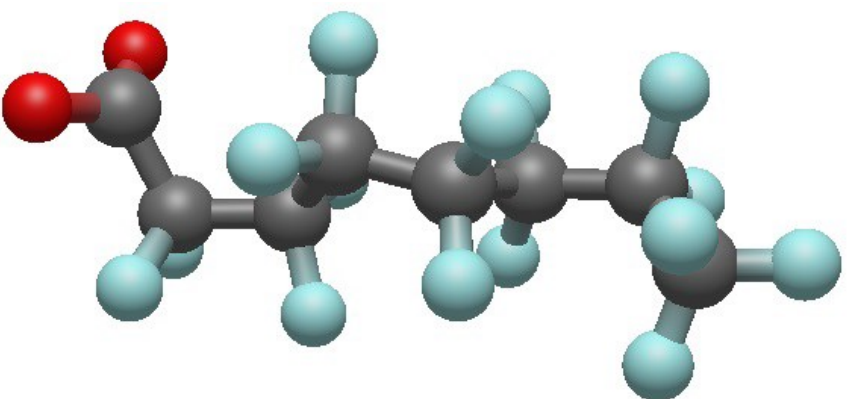

2

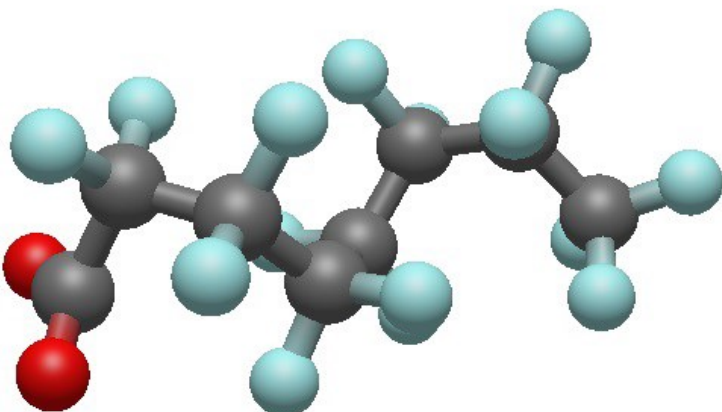

3

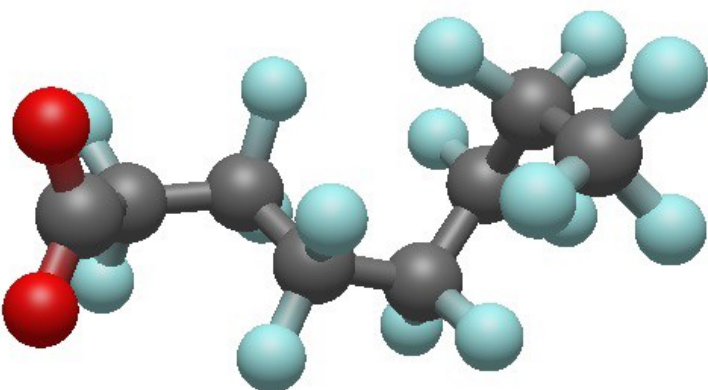

4

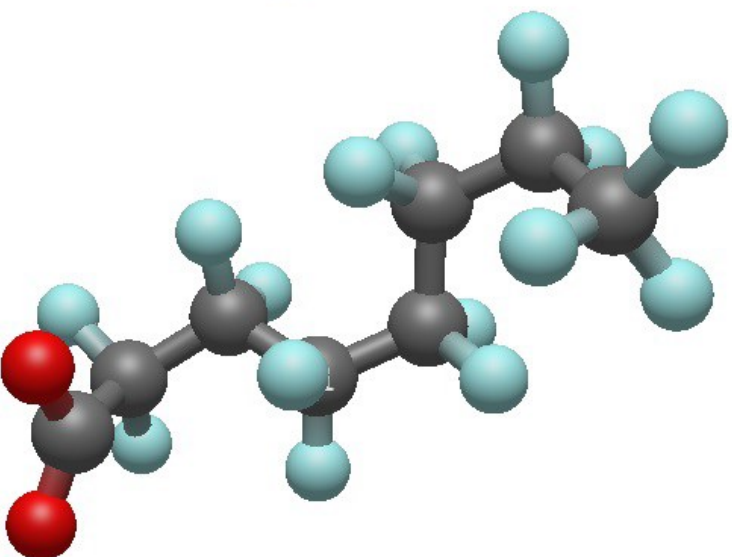

5

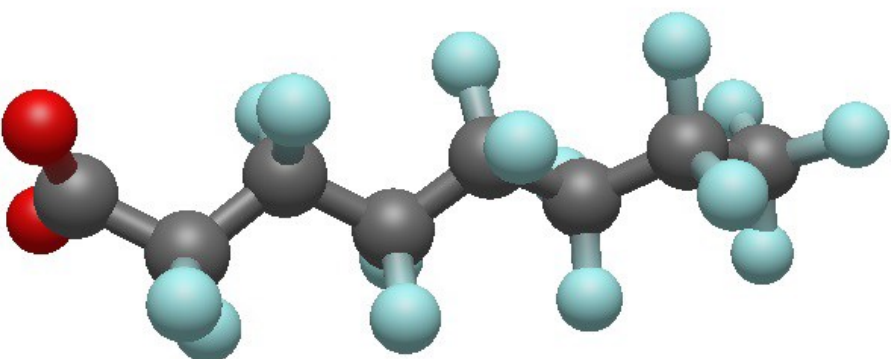

Supplement: d0cp02445g3.pdf [file d0cp02445g3.pdf]

## TD-DFT/M06-2X/6-311+G(2d,2p)

### PFBS

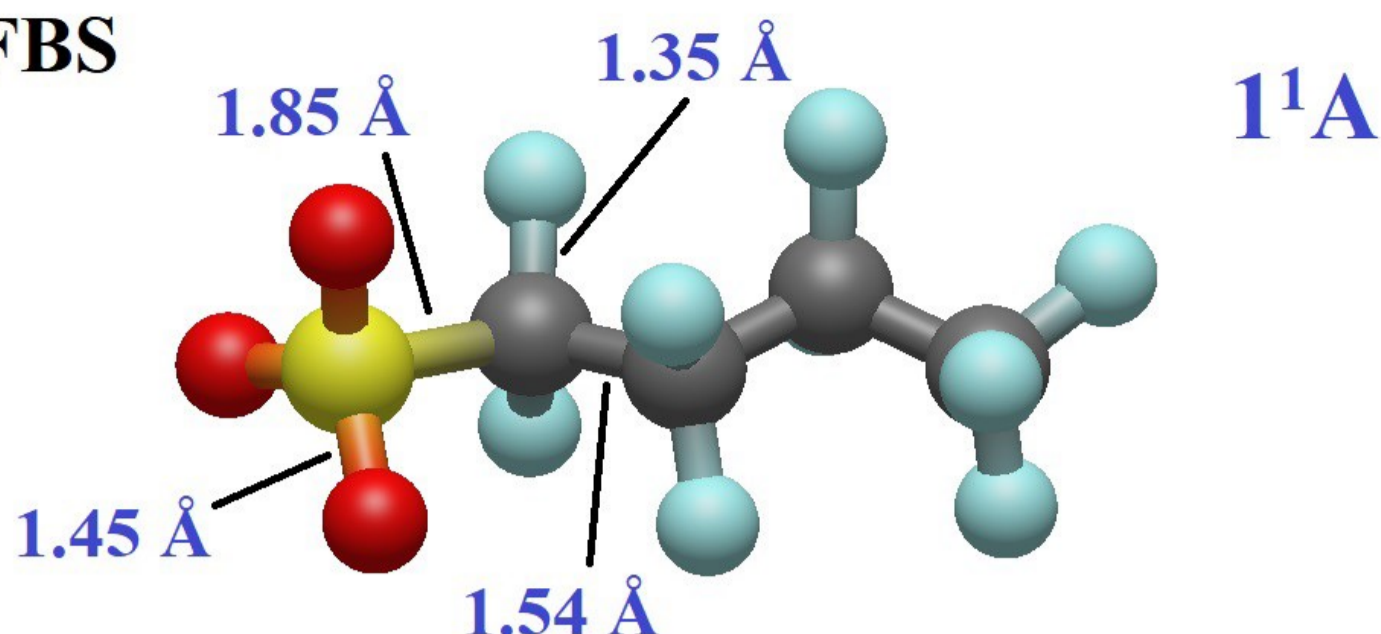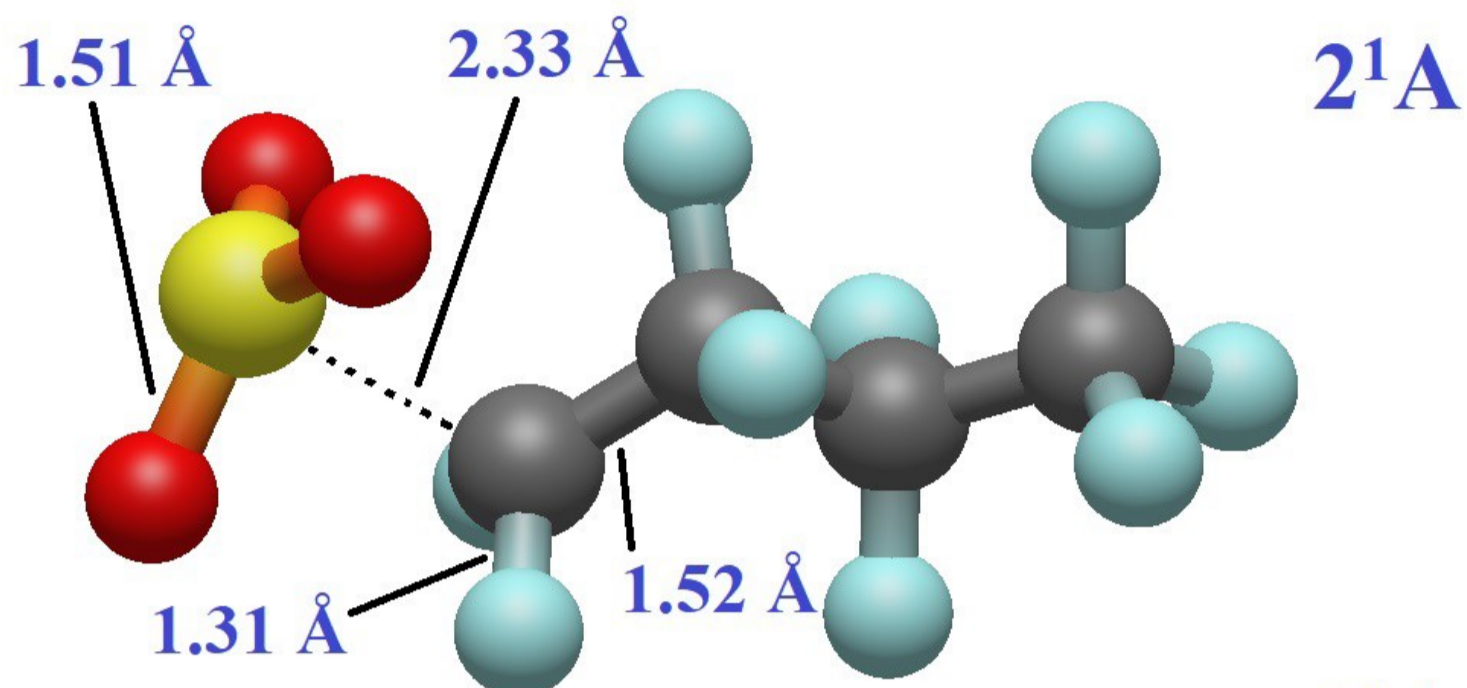

### PFOS

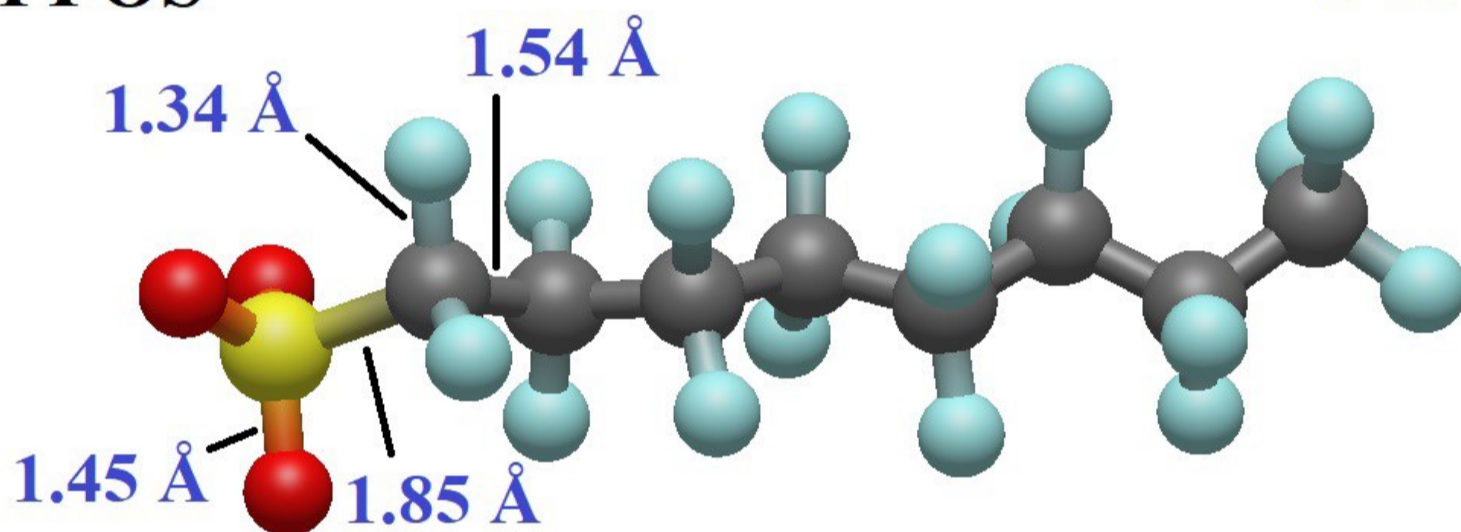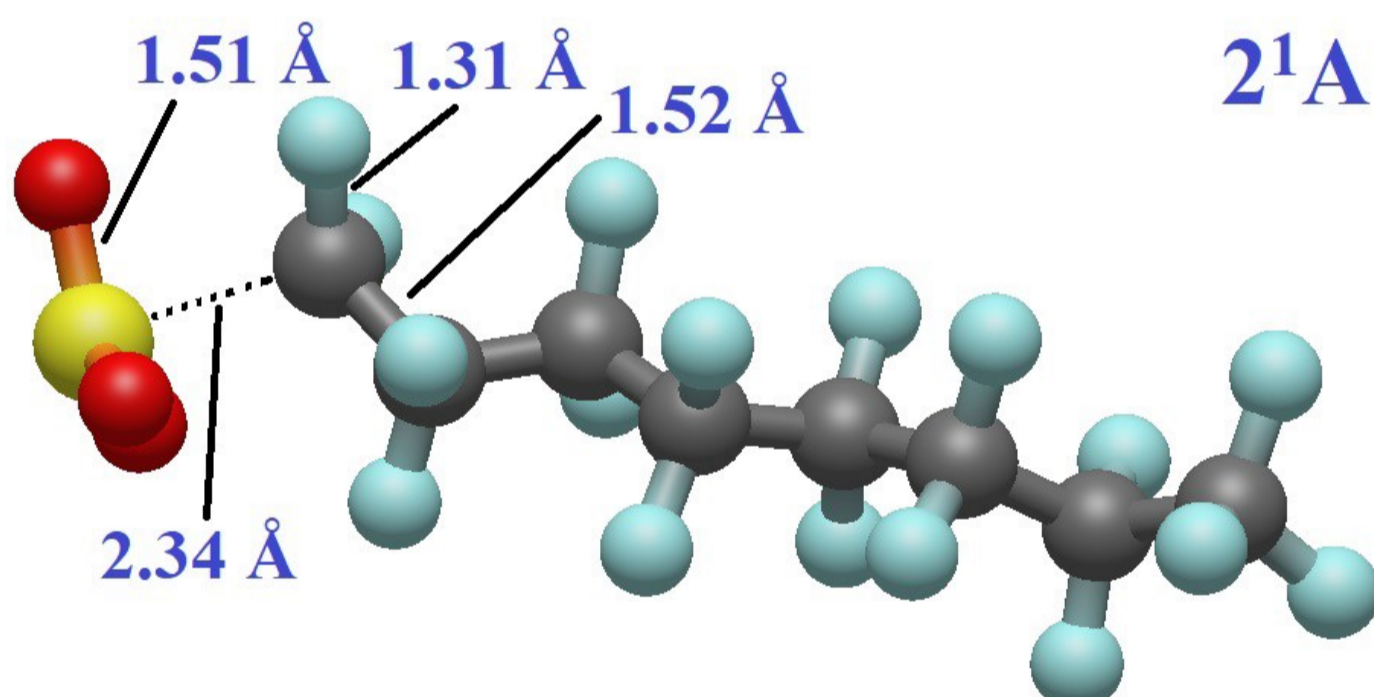

### PFOA

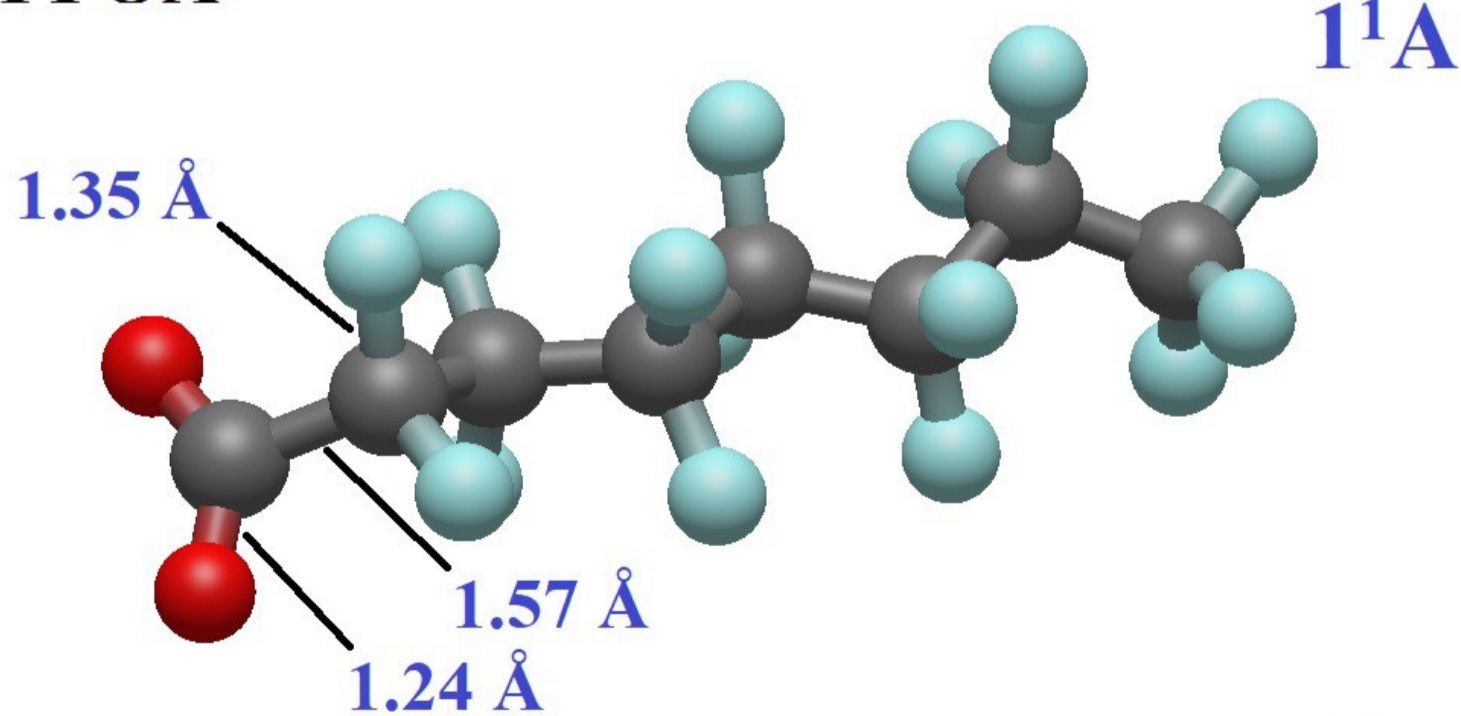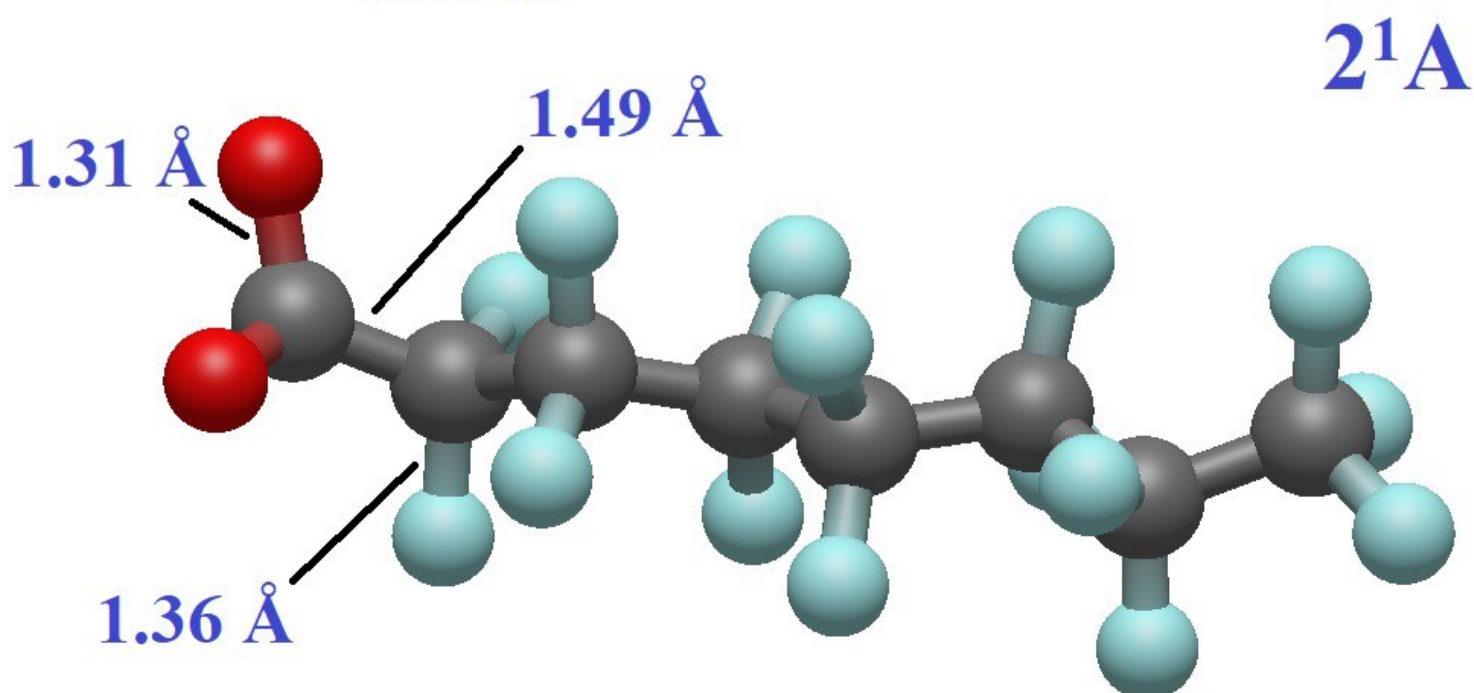

Supplement: d0cp02445g4.pdf [file d0cp02445g4.pdf]

# PFOA

TD-DFT/M06-2X/6-311+G(2d,2p)

(protonated)

## 1<sup>1</sup>A

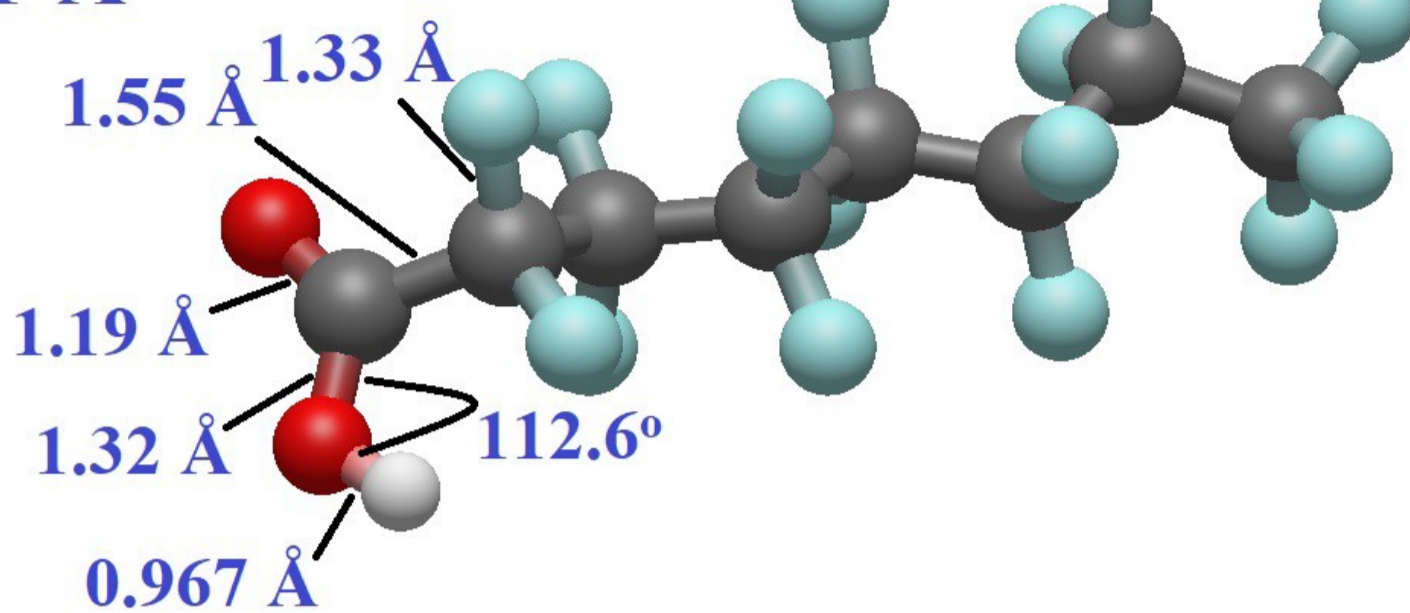

## 2<sup>1</sup>A

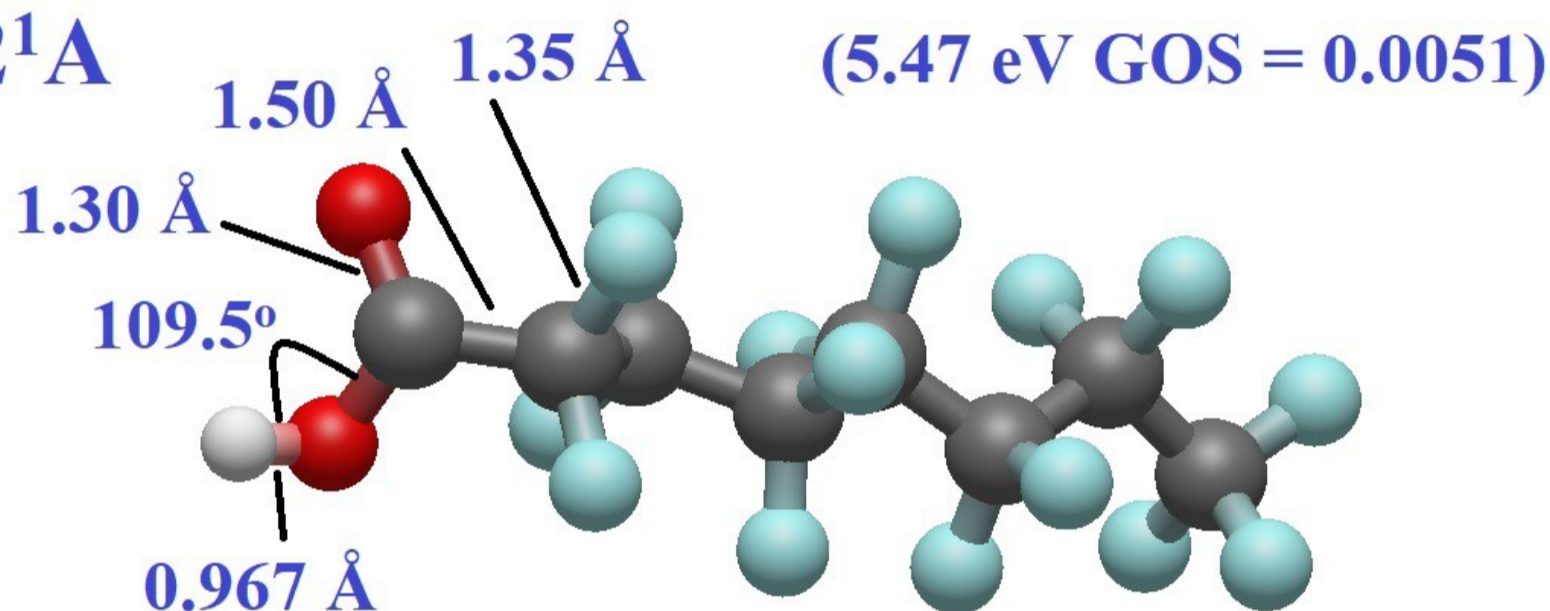

## 3<sup>1</sup>A

(8.10 eV GOS = 0.1571)

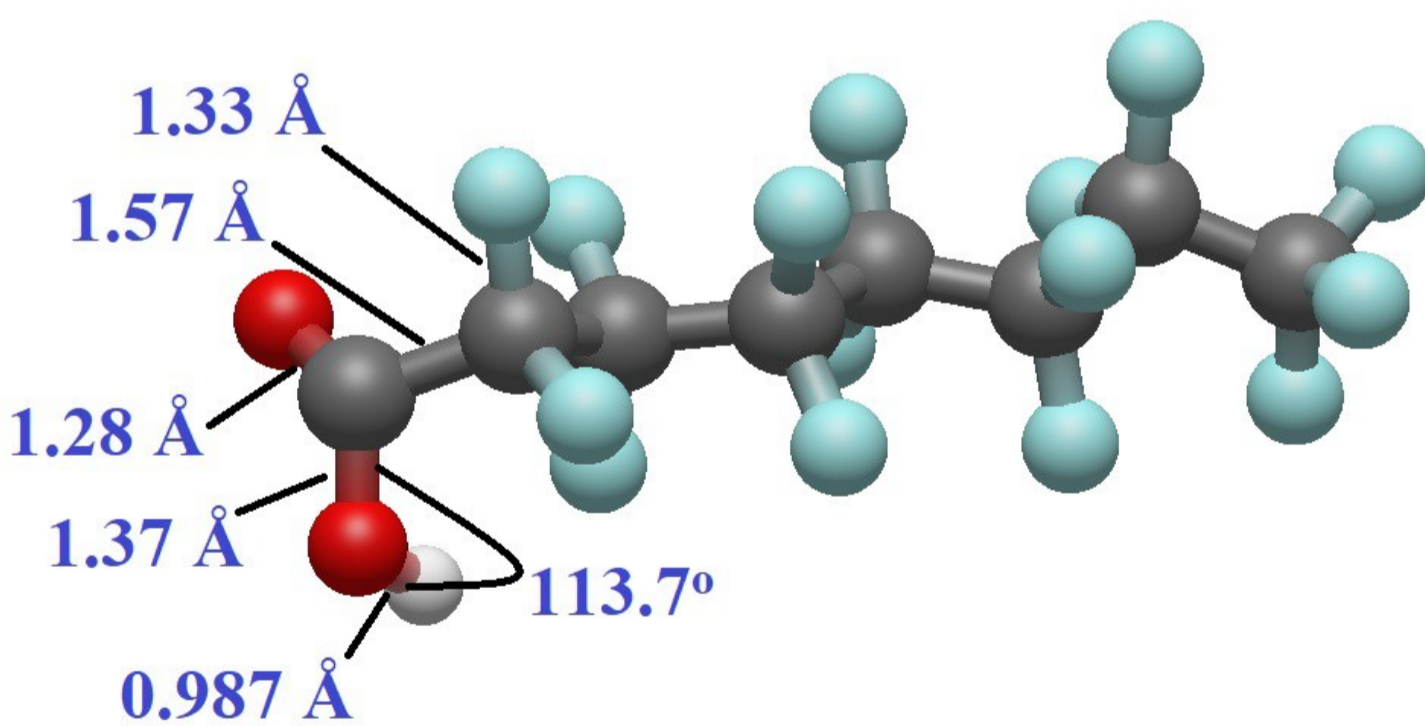

## LUMO

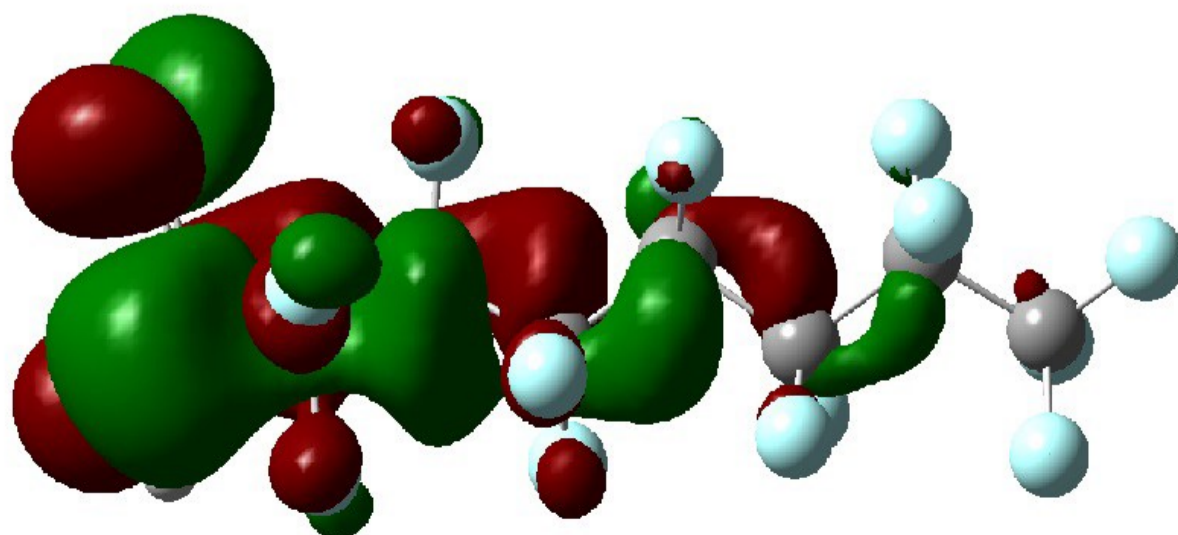

Supplement: d0cp02445g5.pdf [file d0cp02445g5.pdf]
